# Supplementary material
Source: publisher figshare collection journal article supplement (https://gsapubs.figshare.com/articles/dataset/_/12915773)
Supplement: Supplementary file 1 [file 1]

Liu Boran, Zhao Xilin, Yu Shengyao, Jiang Yang, Mao Jianren, Xu Mincheng, and Li Zilong, 2020, Late Mesozoic Paleo-Pacific Plate “scissors-like” subduction: Insight from the magmatism in the Gan-Hang Belt, Southeast China: GSA Bulletin, <https://doi.org/10.1130/B35743.1>.

## Supplemental Material

**Table S1.** Zircon ages based on LA–ICP–MS U–Pb dating of granites within the Gan-Hang Belt.

**Table S2.** Major-element (wt%), REE, and trace-element (ppm) compositions of the Damaoshan pluton, Jiangxi Province.

**Table S3.**

**Table S4.**

**Table S5.**

**Table S6.**

Table S1. Zircon ages based on LA–ICP–MS U–Pb dating of granites within the Gan–Hang Belt

|                                          | U(10 <sup>-6</sup> ) | Th(10 <sup>-6</sup> ) | Th/U | <sup>206</sup> Pb*/ <sup>238</sup> U(1) | <sup>207</sup> Pb*/ <sup>235</sup> U(1) | <sup>207</sup> Pb*/ <sup>206</sup> Pb*(1) | <sup>206</sup> Pb/ <sup>238</sup> U(Ma)(1) | <sup>207</sup> Pb/ <sup>206</sup> Pb(Ma)(1) |        |        |      |        |        |
|------------------------------------------|----------------------|-----------------------|------|-----------------------------------------|-----------------------------------------|-------------------------------------------|--------------------------------------------|---------------------------------------------|--------|--------|------|--------|--------|
| Damaoshan (DM3) (E 117.6511°, N28.6953°) |                      |                       |      |                                         |                                         |                                           |                                            |                                             |        |        |      |        |        |
| DM3.1                                    | 9949                 | 2587                  | 0.26 | 0.0217                                  | 0.0002                                  | 0.1472                                    | 0.0023                                     | 0.0491                                      | 0.0005 | 138.61 | 1.28 | 153.78 | 24.48  |
| DM3.2                                    | 2638                 | 396                   | 0.15 | 0.0220                                  | 0.0002                                  | 0.1478                                    | 0.0024                                     | 0.0488                                      | 0.0006 | 140.11 | 1.42 | 137.66 | 29.71  |
| DM3.3                                    | 1312                 | 394                   | 0.30 | 0.0216                                  | 0.0002                                  | 0.1496                                    | 0.0026                                     | 0.0503                                      | 0.0007 | 137.51 | 1.31 | 210.67 | 32.79  |
| DM3.4                                    | 281                  | 81                    | 0.29 | 0.0217                                  | 0.0002                                  | 0.1511                                    | 0.0043                                     | 0.0505                                      | 0.0013 | 138.46 | 1.57 | 217.34 | 61.44  |
| DM3.5                                    | 403                  | 153                   | 0.38 | 0.0218                                  | 0.0002                                  | 0.1546                                    | 0.0039                                     | 0.0515                                      | 0.0012 | 138.95 | 1.59 | 262.18 | 52.33  |
| DM3.6                                    | 973                  | 204                   | 0.21 | 0.0222                                  | 0.0002                                  | 0.1549                                    | 0.0030                                     | 0.0505                                      | 0.0008 | 141.76 | 1.55 | 219.31 | 36.79  |
| DM3.7                                    | 6757                 | 1014                  | 0.15 | 0.0216                                  | 0.0002                                  | 0.1530                                    | 0.0025                                     | 0.0514                                      | 0.0005 | 137.54 | 1.54 | 260.95 | 23.83  |
| DM3.8                                    | 3545                 | 1276                  | 0.36 | 0.0215                                  | 0.0003                                  | 0.1460                                    | 0.0032                                     | 0.0492                                      | 0.0007 | 137.13 | 1.79 | 159.29 | 34.06  |
| DM3.9                                    | 4159                 | 1289                  | 0.31 | 0.0220                                  | 0.0003                                  | 0.1544                                    | 0.0029                                     | 0.0509                                      | 0.0006 | 140.44 | 2.08 | 234.18 | 26.51  |
| DM3.10                                   | 3433                 | 927                   | 0.27 | 0.0226                                  | 0.0003                                  | 0.1570                                    | 0.0032                                     | 0.0504                                      | 0.0007 | 143.91 | 2.22 | 214.93 | 32.67  |
| DM3.11                                   | 2208                 | 397                   | 0.18 | 0.0222                                  | 0.0004                                  | 0.1515                                    | 0.0034                                     | 0.0494                                      | 0.0007 | 141.71 | 2.74 | 168.25 | 35.42  |
| DM3.12                                   | 495                  | 114                   | 0.23 | 0.0217                                  | 0.0004                                  | 0.1511                                    | 0.0038                                     | 0.0504                                      | 0.0011 | 138.67 | 2.24 | 213.86 | 50.98  |
| DM3.13                                   | 3745                 | 786                   | 0.21 | 0.0218                                  | 0.0003                                  | 0.1481                                    | 0.0031                                     | 0.0492                                      | 0.0007 | 139.27 | 1.96 | 156.69 | 35.01  |
| DM3.14                                   | 4897                 | 1028                  | 0.21 | 0.0225                                  | 0.0003                                  | 0.1553                                    | 0.0026                                     | 0.0501                                      | 0.0006 | 143.27 | 2.12 | 200.39 | 27.66  |
| DM3.15                                   | 553                  | 144                   | 0.26 | 0.0219                                  | 0.0003                                  | 0.1567                                    | 0.0036                                     | 0.0518                                      | 0.0011 | 139.83 | 1.69 | 277.56 | 47.17  |
| DM3.16                                   | 5235                 | 628                   | 0.12 | 0.0220                                  | 0.0003                                  | 0.1531                                    | 0.0030                                     | 0.0504                                      | 0.0007 | 140.45 | 1.62 | 214.41 | 33.00  |
| DM3.17                                   | 659                  | 112                   | 0.17 | 0.0218                                  | 0.0003                                  | 0.1546                                    | 0.0033                                     | 0.0514                                      | 0.0010 | 139.12 | 1.92 | 258.16 | 44.91  |
| DM3.18                                   | 780                  | 156                   | 0.20 | 0.0220                                  | 0.0003                                  | 0.1553                                    | 0.0041                                     | 0.0511                                      | 0.0011 | 140.45 | 1.80 | 246.58 | 51.44  |
| DM3.19                                   | 2219                 | 488                   | 0.22 | 0.0218                                  | 0.0003                                  | 0.1461                                    | 0.0027                                     | 0.0486                                      | 0.0007 | 138.98 | 1.84 | 130.14 | 35.20  |
| DM3.20                                   | 254                  | 56                    | 0.22 | 0.0222                                  | 0.0003                                  | 0.1495                                    | 0.0060                                     | 0.0489                                      | 0.0019 | 141.28 | 1.94 | 144.96 | 90.01  |
| DM3.21                                   | 4577                 | 778                   | 0.17 | 0.0220                                  | 0.0002                                  | 0.1520                                    | 0.0028                                     | 0.0500                                      | 0.0008 | 140.44 | 1.52 | 196.86 | 37.01  |
| DM3.22                                   | 265                  | 77                    | 0.29 | 0.0220                                  | 0.0003                                  | 0.1482                                    | 0.0058                                     | 0.0489                                      | 0.0018 | 140.11 | 1.99 | 144.50 | 88.52  |
| DM3.23                                   | 390                  | 86                    | 0.22 | 0.0218                                  | 0.0003                                  | 0.1498                                    | 0.0044                                     | 0.0498                                      | 0.0014 | 139.11 | 1.81 | 185.79 | 64.12  |
| DM3.24                                   | 307                  | 83                    | 0.27 | 0.0219                                  | 0.0003                                  | 0.1525                                    | 0.0057                                     | 0.0506                                      | 0.0019 | 139.43 | 2.01 | 222.11 | 86.63  |
| Damaoshan (DM2) (E 117.6633°, N28.6842°) |                      |                       |      |                                         |                                         |                                           |                                            |                                             |        |        |      |        |        |
| DM2.1                                    | 135                  | 130                   | 0.97 | 0.0212                                  | 0.0002                                  | 0.1402                                    | 0.0098                                     | 0.0479                                      | 0.0034 | 135.48 | 1.52 | 92.58  | 169.39 |
| DM2.2                                    | 238                  | 172                   | 0.72 | 0.0207                                  | 0.0002                                  | 0.1380                                    | 0.0060                                     | 0.0484                                      | 0.0021 | 132.00 | 1.39 | 117.82 | 102.63 |
| DM2.3                                    | 153                  | 107                   | 0.70 | 0.0226                                  | 0.0003                                  | 0.1464                                    | 0.0052                                     | 0.0469                                      | 0.0018 | 144.34 | 1.62 | 44.54  | 91.58  |
| DM2.4                                    | 668                  | 342                   | 0.51 | 0.0213                                  | 0.0002                                  | 0.1397                                    | 0.0025                                     | 0.0475                                      | 0.0009 | 136.00 | 1.43 | 75.80  | 45.28  |
| DM2.5                                    | 97                   | 69                    | 0.71 | 0.0225                                  | 0.0003                                  | 0.1491                                    | 0.0051                                     | 0.0480                                      | 0.0014 | 143.49 | 1.84 | 100.64 | 70.92  |
| DM2.6                                    | 272                  | 185                   | 0.68 | 0.0222                                  | 0.0002                                  | 0.1423                                    | 0.0058                                     | 0.0466                                      | 0.0019 | 141.33 | 1.44 | 26.66  | 97.38  |
| DM2.7                                    | 221                  | 193                   | 0.88 | 0.0213                                  | 0.0002                                  | 0.1429                                    | 0.0074                                     | 0.0487                                      | 0.0025 | 135.90 | 1.42 | 131.33 | 119.33 |
| DM2.8                                    | 187                  | 111                   | 0.60 | 0.0208                                  | 0.0002                                  | 0.1397                                    | 0.0105                                     | 0.0487                                      | 0.0036 | 132.72 | 1.42 | 134.17 | 175.48 |
| DM2.9                                    | 218                  | 182                   | 0.83 | 0.0207                                  | 0.0002                                  | 0.1405                                    | 0.0064                                     | 0.0491                                      | 0.0021 | 132.33 | 1.56 | 154.20 | 102.38 |
| DM2.10                                   | 162                  | 95                    | 0.59 | 0.0214                                  | 0.0003                                  | 0.1409                                    | 0.0080                                     | 0.0478                                      | 0.0026 | 136.44 | 1.92 | 88.61  | 127.77 |
| DM2.11                                   | 313                  | 197                   | 0.63 | 0.0210                                  | 0.0003                                  | 0.1387                                    | 0.0069                                     | 0.0480                                      | 0.0023 | 133.75 | 1.85 | 97.98  | 113.98 |
| DM2.12                                   | 519                  | 448                   | 0.86 | 0.0209                                  | 0.0002                                  | 0.1373                                    | 0.0039                                     | 0.0476                                      | 0.0013 | 133.46 | 1.32 | 79.72  | 64.68  |
| DM2.13                                   | 272                  | 158                   | 0.58 | 0.0216                                  | 0.0002                                  | 0.1447                                    | 0.0030                                     | 0.0485                                      | 0.0010 | 137.84 | 1.41 | 125.89 | 46.71  |
| DM2.14                                   | 284                  | 140                   | 0.49 | 0.0214                                  | 0.0002                                  | 0.1444                                    | 0.0078                                     | 0.0491                                      | 0.0026 | 136.19 | 1.37 | 150.78 | 125.54 |
| DM2.15                                   | 97                   | 99                    | 1.01 | 0.0206                                  | 0.0002                                  | 0.1395                                    | 0.0037                                     | 0.0492                                      | 0.0013 | 131.23 | 1.45 | 156.50 | 59.97  |
| DM2.16                                   | 393                  | 214                   | 0.54 | 0.0202                                  | 0.0002                                  | 0.1381                                    | 0.0044                                     | 0.0496                                      | 0.0015 | 128.87 | 1.28 | 177.25 | 71.62  |
| DM2.17                                   | 474                  | 356                   | 0.75 | 0.0213                                  | 0.0002                                  | 0.1401                                    | 0.0029                                     | 0.0478                                      | 0.0009 | 135.61 | 1.35 | 88.29  | 46.43  |
| DM2.18                                   | 220                  | 99                    | 0.45 | 0.0213                                  | 0.0002                                  | 0.1433                                    | 0.0150                                     | 0.0489                                      | 0.0051 | 135.64 | 1.59 | 142.03 | 246.45 |
| DM2.19                                   | 265                  | 161                   | 0.61 | 0.0208                                  | 0.0002                                  | 0.1412                                    | 0.0114                                     | 0.0493                                      | 0.0039 | 132.62 | 1.48 | 160.37 | 186.92 |
| DM2.20                                   | 259                  | 170                   | 0.66 | 0.0201                                  | 0.0002                                  | 0.1400                                    | 0.0131                                     | 0.0506                                      | 0.0047 | 128.01 | 1.36 | 224.36 | 215.01 |
| DM2.21                                   | 184                  | 94                    | 0.51 | 0.0209                                  | 0.0002                                  | 0.1408                                    | 0.0068                                     | 0.0489                                      | 0.0023 | 133.24 | 1.42 | 143.64 | 109.92 |
| DM2.22                                   | 504                  | 276                   | 0.55 | 0.0200                                  | 0.0002                                  | 0.1384                                    | 0.0086                                     | 0.0501                                      | 0.0029 | 127.96 | 1.39 | 198.81 | 136.75 |
| DM2.23                                   | 399                  | 316                   | 0.79 | 0.0201                                  | 0.0002                                  | 0.1342                                    | 0.0054                                     | 0.0483                                      | 0.0019 | 128.48 | 1.29 | 115.77 | 94.23  |
| DM2.24                                   | 587                  | 594                   | 1.01 | 0.0211                                  | 0.0002                                  | 0.1430                                    | 0.0023                                     | 0.0492                                      | 0.0007 | 134.35 | 1.43 | 159.06 | 35.40  |

| DM2.25                                     | 640  | 338  | 0.53 | 0.0205 | 0.0002 | 0.1539 | 0.0095 | 0.0543 | 0.0034 | 131.02 | 1.26 | 385.55 | 139.01  |
|--------------------------------------------|------|------|------|--------|--------|--------|--------|--------|--------|--------|------|--------|---------|
| Qianshan (QS3) (E 117.4593°, N28.3945°)    |      |      |      |        |        |        |        |        |        |        |      |        |         |
| QS3.1                                      | 92   | 99   | 1.08 | 0.0214 | 0.0003 | 0.1428 | 0.0101 | 0.0485 | 0.0033 | 136.26 | 1.72 | 123.41 | 160.88  |
| QS3.2                                      | 80   | 98   | 1.23 | 0.0208 | 0.0004 | 0.1408 | 0.0234 | 0.0491 | 0.0077 | 132.57 | 2.54 | 154.25 | 368.31  |
| QS3.3                                      | 62   | 67   | 1.08 | 0.0218 | 0.0005 | 0.1466 | 0.0302 | 0.0487 | 0.0098 | 139.08 | 3.24 | 135.40 | 470.36  |
| QS3.4                                      | 47   | 50   | 1.06 | 0.0221 | 0.0003 | 0.1472 | 0.0119 | 0.0483 | 0.0039 | 140.97 | 1.98 | 112.69 | 190.02  |
| QS3.5                                      | 68   | 62   | 0.91 | 0.0216 | 0.0004 | 0.1456 | 0.0184 | 0.0489 | 0.0062 | 137.78 | 2.49 | 142.36 | 296.01  |
| QS3.6                                      | 60   | 118  | 1.97 | 0.0223 | 0.0004 | 0.1493 | 0.0233 | 0.0486 | 0.0077 | 142.13 | 2.50 | 126.84 | 371.67  |
| QS3.7                                      | 1213 | 1341 | 1.11 | 0.0215 | 0.0002 | 0.1443 | 0.0028 | 0.0488 | 0.0009 | 136.96 | 1.33 | 135.85 | 44.17   |
| QS3.8                                      | 90   | 122  | 1.36 | 0.0210 | 0.0003 | 0.1406 | 0.0164 | 0.0485 | 0.0057 | 134.13 | 2.10 | 124.65 | 277.10  |
| QS3.9                                      | 42   | 52   | 1.24 | 0.0221 | 0.0006 | 0.1482 | 0.0132 | 0.0487 | 0.0044 | 140.75 | 4.08 | 132.41 | 213.91  |
| QS3.10                                     | 195  | 174  | 0.89 | 0.0227 | 0.0003 | 0.1500 | 0.0132 | 0.0479 | 0.0044 | 144.88 | 2.10 | 91.98  | 219.07  |
| QS3.11                                     | 163  | 203  | 1.25 | 0.0210 | 0.0003 | 0.1480 | 0.0190 | 0.0510 | 0.0062 | 134.25 | 2.11 | 240.37 | 280.92  |
| QS3.12                                     | 1059 | 1203 | 1.14 | 0.0209 | 0.0003 | 0.1407 | 0.0032 | 0.0489 | 0.0010 | 133.03 | 1.71 | 144.97 | 47.67   |
| QS3.13                                     | 109  | 128  | 1.17 | 0.0210 | 0.0002 | 0.1420 | 0.0095 | 0.0489 | 0.0032 | 134.27 | 1.52 | 145.37 | 154.44  |
| QS3.14                                     | 130  | 116  | 0.89 | 0.0212 | 0.0002 | 0.1432 | 0.0101 | 0.0489 | 0.0034 | 135.41 | 1.52 | 144.18 | 162.47  |
| QS3.15                                     | 529  | 612  | 1.16 | 0.0210 | 0.0003 | 0.1451 | 0.0047 | 0.0501 | 0.0013 | 134.00 | 1.97 | 199.07 | 61.91   |
| QS3.16                                     | 183  | 259  | 1.42 | 0.0215 | 0.0002 | 0.1441 | 0.0058 | 0.0487 | 0.0020 | 137.01 | 1.59 | 131.61 | 94.49   |
| QS3.17                                     | 227  | 200  | 0.88 | 0.0206 | 0.0003 | 0.1404 | 0.0152 | 0.0495 | 0.0052 | 131.23 | 1.76 | 172.77 | 242.90  |
| QS3.18                                     | 853  | 1195 | 1.40 | 0.0206 | 0.0002 | 0.1388 | 0.0023 | 0.0487 | 0.0007 | 131.74 | 1.44 | 135.47 | 33.78   |
| QS3.19                                     | 288  | 321  | 1.11 | 0.0210 | 0.0002 | 0.1429 | 0.0052 | 0.0494 | 0.0016 | 133.92 | 1.49 | 165.66 | 76.99   |
| QS3.20                                     | 1353 | 665  | 0.49 | 0.0180 | 0.0002 | 0.1416 | 0.0030 | 0.0570 | 0.0011 | 115.17 | 1.13 | 490.46 | 42.71   |
| QS3.21                                     | 515  | 764  | 1.48 | 0.0217 | 0.0002 | 0.1436 | 0.0034 | 0.0481 | 0.0011 | 138.23 | 1.37 | 102.44 | 53.23   |
| QS3.22                                     | 333  | 482  | 1.45 | 0.0213 | 0.0002 | 0.1422 | 0.0053 | 0.0484 | 0.0016 | 135.98 | 1.55 | 117.51 | 80.35   |
| QS3.23                                     | 69   | 65   | 0.94 | 0.0214 | 0.0003 | 0.1450 | 0.0134 | 0.0491 | 0.0045 | 136.73 | 1.66 | 150.26 | 214.35  |
| QS3.24                                     | 92   | 116  | 1.26 | 0.0209 | 0.0003 | 0.1424 | 0.0132 | 0.0494 | 0.0046 | 133.45 | 1.61 | 166.04 | 218.96  |
| QS3.25                                     | 107  | 113  | 1.06 | 0.0212 | 0.0002 | 0.1428 | 0.0099 | 0.0489 | 0.0034 | 135.10 | 1.49 | 143.65 | 161.95  |
| Fenglonggu (FLG1) (E 117.9024°, N28.0702°) |      |      |      |        |        |        |        |        |        |        |      |        |         |
| FLG1.1                                     | 98   | 81   | 0.90 | 0.0209 | 0.0003 | 0.1390 | 0.0140 | 0.0481 | 0.0048 | 133.58 | 1.82 | 105.81 | 237.83  |
| FLG1.2                                     | 90   | 140  | 1.56 | 0.0209 | 0.0003 | 0.1390 | 0.0140 | 0.0487 | 0.0159 | 133.58 | 1.82 | 105.81 | 237.83  |
| FLG1.3                                     | 60   | 96   | 1.60 | 0.0208 | 0.0005 | 0.1396 | 0.0450 | 0.0486 | 0.0128 | 132.57 | 3.01 | 135.25 | 768.48  |
| FLG1.4                                     | 108  | 103  | 0.95 | 0.0209 | 0.0007 | 0.1405 | 0.0361 | 0.0484 | 0.0057 | 133.62 | 4.45 | 130.39 | 619.38  |
| FLG1.5                                     | 54   | 59   | 1.09 | 0.0215 | 0.0003 | 0.1432 | 0.0169 | 0.0484 | 0.0162 | 136.88 | 2.05 | 117.97 | 278.06  |
| FLG1.6                                     | 219  | 303  | 1.38 | 0.0214 | 0.0004 | 0.1428 | 0.0478 | 0.0487 | 0.0030 | 136.45 | 2.48 | 120.22 | 787.74  |
| FLG1.7                                     | 78   | 92   | 1.18 | 0.0212 | 0.0003 | 0.1426 | 0.0090 | 0.0501 | 0.0041 | 135.44 | 1.69 | 133.82 | 144.70  |
| FLG1.8                                     | 55   | 39   | 0.71 | 0.0211 | 0.0002 | 0.1455 | 0.0123 | 0.0489 | 0.0196 | 134.39 | 1.58 | 198.79 | 191.12  |
| FLG1.9                                     | 2109 | 2019 | 0.96 | 0.0211 | 0.0005 | 0.1425 | 0.0527 | 0.0490 | 0.0027 | 134.92 | 3.39 | 140.65 | 942.04  |
| FLG1.10                                    | 306  | 724  | 2.37 | 0.0221 | 0.0003 | 0.1491 | 0.0117 | 0.0491 | 0.0032 | 140.75 | 1.60 | 147.28 | 131.28  |
| FLG1.11                                    | 187  | 302  | 1.61 | 0.0218 | 0.0003 | 0.1474 | 0.0101 | 0.0480 | 0.0025 | 138.98 | 1.62 | 150.76 | 154.73  |
| FLG1.12                                    | 783  | 730  | 0.93 | 0.0216 | 0.0002 | 0.1432 | 0.0074 | 0.0492 | 0.0009 | 137.88 | 1.46 | 100.66 | 120.85  |
| FLG1.13                                    | 140  | 107  | 0.76 | 0.0214 | 0.0002 | 0.1453 | 0.0030 | 0.0490 | 0.0035 | 136.77 | 1.36 | 155.56 | 45.01   |
| FLG1.14                                    | 76   | 86   | 1.13 | 0.0213 | 0.0003 | 0.1440 | 0.0106 | 0.0486 | 0.0059 | 136.05 | 1.82 | 145.66 | 165.79  |
| FLG1.15                                    | 53   | 56   | 1.06 | 0.0213 | 0.0003 | 0.1427 | 0.0170 | 0.0492 | 0.0099 | 135.95 | 1.69 | 127.17 | 287.06  |
| FLG1.16                                    | 603  | 517  | 0.86 | 0.0206 | 0.0003 | 0.1400 | 0.0266 | 0.0490 | 0.0010 | 131.69 | 2.18 | 157.05 | 468.79  |
| FLG1.17                                    | 22   | 21   | 0.95 | 0.0211 | 0.0002 | 0.1425 | 0.0030 | 0.0494 | 0.0219 | 134.64 | 1.41 | 146.40 | 46.59   |
| FLG1.18                                    | 146  | 184  | 1.26 | 0.0214 | 0.0006 | 0.1457 | 0.0649 | 0.0495 | 0.0028 | 136.49 | 4.11 | 165.53 | 1034.28 |
| FLG1.19                                    | 89   | 80   | 0.90 | 0.0210 | 0.0002 | 0.1436 | 0.0080 | 0.0493 | 0.0057 | 134.08 | 1.49 | 173.65 | 130.04  |
| FLG1.20                                    | 65   | 83   | 1.28 | 0.0210 | 0.0003 | 0.1426 | 0.0165 | 0.0488 | 0.0069 | 133.77 | 1.67 | 163.75 | 271.63  |
| FLG1.21                                    | 71   | 80   | 1.13 | 0.0209 | 0.0003 | 0.1407 | 0.0200 | 0.0493 | 0.0067 | 133.47 | 1.87 | 136.46 | 331.54  |
| FLG1.22                                    | 107  | 101  | 0.94 | 0.0210 | 0.0004 | 0.1427 | 0.0198 | 0.0493 | 0.0039 | 133.94 | 2.57 | 162.15 | 316.06  |
| FLG1.23                                    | 557  | 880  | 1.58 | 0.0216 | 0.0003 | 0.1469 | 0.0119 | 0.0492 | 0.0010 | 137.76 | 1.82 | 162.71 | 186.97  |
| FLG1.24                                    | 110  | 117  | 1.06 | 0.0209 | 0.0002 | 0.1422 | 0.0031 | 0.0491 | 0.0022 | 133.63 | 1.36 | 159.49 | 49.31   |
| FLG1.25                                    | 267  | 275  | 1.03 | 0.0210 | 0.0002 | 0.1422 | 0.0064 | 0.0495 | 0.0018 | 133.95 | 1.47 | 153.07 | 104.12  |
| Hecun (HC1) (E 118.4000°, N28.9473°)       |      |      |      |        |        |        |        |        |        |        |      |        |         |

|                                            |      |      |      |        |        |        |        |        |        |        |      |        |        |
|--------------------------------------------|------|------|------|--------|--------|--------|--------|--------|--------|--------|------|--------|--------|
| HC1.1                                      | 419  | 312  | 0.74 | 0.0243 | 0.0002 | 0.1641 | 0.0069 | 0.0489 | 0.0020 | 155.07 | 1.52 | 142.35 | 96.44  |
| HC1.2                                      | 539  | 641  | 1.19 | 0.0250 | 0.0002 | 0.1678 | 0.0035 | 0.0486 | 0.0009 | 159.38 | 1.59 | 128.88 | 45.91  |
| HC1.3                                      | 1065 | 742  | 0.70 | 0.0246 | 0.0003 | 0.1685 | 0.0042 | 0.0496 | 0.0011 | 156.80 | 1.65 | 178.36 | 52.94  |
| HC1.4                                      | 596  | 332  | 0.56 | 0.0248 | 0.0003 | 0.1681 | 0.0034 | 0.0492 | 0.0010 | 157.62 | 1.62 | 159.52 | 45.79  |
| HC1.5                                      | 729  | 483  | 0.66 | 0.0250 | 0.0003 | 0.1670 | 0.0028 | 0.0485 | 0.0007 | 159.01 | 1.70 | 123.56 | 36.32  |
| HC1.6                                      | 407  | 289  | 0.71 | 0.0248 | 0.0003 | 0.1716 | 0.0040 | 0.0502 | 0.0011 | 157.93 | 1.73 | 203.33 | 50.11  |
| HC1.7                                      | 708  | 444  | 0.63 | 0.0247 | 0.0003 | 0.1696 | 0.0031 | 0.0499 | 0.0009 | 157.03 | 1.74 | 188.99 | 39.79  |
| HC1.8                                      | 405  | 291  | 0.72 | 0.0249 | 0.0003 | 0.1676 | 0.0036 | 0.0488 | 0.0010 | 158.55 | 1.64 | 138.41 | 48.73  |
| HC1.9                                      | 306  | 215  | 0.70 | 0.0250 | 0.0003 | 0.1697 | 0.0047 | 0.0493 | 0.0013 | 158.93 | 1.76 | 162.88 | 60.88  |
| HC1.10                                     | 546  | 332  | 0.61 | 0.0247 | 0.0003 | 0.1691 | 0.0030 | 0.0496 | 0.0008 | 157.30 | 1.62 | 178.47 | 38.99  |
| HC1.11                                     | 532  | 404  | 0.76 | 0.0247 | 0.0002 | 0.1705 | 0.0033 | 0.0500 | 0.0009 | 157.49 | 1.55 | 195.28 | 42.03  |
| HC1.12                                     | 678  | 352  | 0.52 | 0.0248 | 0.0003 | 0.1701 | 0.0031 | 0.0497 | 0.0008 | 157.92 | 1.74 | 183.26 | 38.34  |
| HC1.13                                     | 361  | 259  | 0.72 | 0.0245 | 0.0003 | 0.1689 | 0.0068 | 0.0501 | 0.0019 | 155.76 | 1.81 | 198.65 | 86.31  |
| HC1.14                                     | 459  | 192  | 0.42 | 0.0325 | 0.0003 | 0.2359 | 0.0048 | 0.0526 | 0.0010 | 206.40 | 2.19 | 310.85 | 42.84  |
| HC1.15                                     | 1411 | 741  | 0.53 | 0.0248 | 0.0003 | 0.1686 | 0.0024 | 0.0493 | 0.0006 | 157.84 | 1.66 | 163.91 | 30.24  |
| HC1.16                                     | 333  | 253  | 0.76 | 0.0247 | 0.0003 | 0.1704 | 0.0072 | 0.0501 | 0.0021 | 156.98 | 1.85 | 200.90 | 97.03  |
| HC1.17                                     | 428  | 259  | 0.61 | 0.0288 | 0.0003 | 0.1980 | 0.0039 | 0.0499 | 0.0010 | 182.82 | 1.90 | 190.79 | 44.70  |
| HC1.18                                     | 452  | 542  | 1.20 | 0.0252 | 0.0004 | 0.1711 | 0.0077 | 0.0492 | 0.0019 | 160.58 | 2.38 | 157.01 | 91.61  |
| HC1.19                                     | 330  | 227  | 0.69 | 0.0284 | 0.0003 | 0.1956 | 0.0052 | 0.0499 | 0.0013 | 180.55 | 1.99 | 192.45 | 58.77  |
| HC1.20                                     | 377  | 349  | 0.93 | 0.0248 | 0.0003 | 0.1698 | 0.0082 | 0.0496 | 0.0023 | 158.17 | 1.90 | 175.47 | 109.11 |
| HC1.21                                     | 320  | 233  | 0.73 | 0.0286 | 0.0003 | 0.1964 | 0.0047 | 0.0499 | 0.0011 | 181.49 | 1.95 | 190.02 | 52.29  |
| HC1.22                                     | 203  | 208  | 1.02 | 0.0286 | 0.0004 | 0.1958 | 0.0099 | 0.0496 | 0.0025 | 181.91 | 2.26 | 176.68 | 117.65 |
| HC1.23                                     | 219  | 146  | 0.67 | 0.0289 | 0.0003 | 0.1974 | 0.0098 | 0.0495 | 0.0025 | 183.74 | 2.10 | 172.29 | 117.25 |
| HC1.24                                     | 419  | 412  | 0.98 | 0.0249 | 0.0003 | 0.1627 | 0.0051 | 0.0474 | 0.0014 | 158.57 | 1.73 | 68.28  | 72.21  |
| HC1.25                                     | 264  | 200  | 0.76 | 0.0252 | 0.0003 | 0.1707 | 0.0107 | 0.0491 | 0.0032 | 160.57 | 1.98 | 152.12 | 150.69 |
| Huangtuling (HT3) (E 118.0422°, N28.7202°) |      |      |      |        |        |        |        |        |        |        |      |        |        |
| HT3.1                                      | 778  | 1193 |      | 0.0237 | 0.0006 | 0.1924 | 0.0082 | 0.0588 | 0.0025 | 150.82 | 4.05 | 561.15 | 92.58  |
| HT3.2                                      | 237  | 344  |      | 0.0247 | 0.0007 | 0.2020 | 0.0090 | 0.0594 | 0.0028 | 157.48 | 4.34 | 583.36 | 99.99  |
| HT3.3                                      | 287  | 259  |      | 0.0258 | 0.0007 | 0.2158 | 0.0100 | 0.0610 | 0.0029 | 164.38 | 4.60 | 638.91 | 103.69 |
| HT3.4                                      | 600  | 319  |      | 0.0245 | 0.0007 | 0.2028 | 0.0076 | 0.0598 | 0.0022 | 156.17 | 4.11 | 596.01 | 76.84  |
| HT3.5                                      | 533  | 320  |      | 0.0233 | 0.0006 | 0.1953 | 0.0074 | 0.0607 | 0.0024 | 148.72 | 3.97 | 631.50 | 89.80  |
| HT3.6                                      | 2885 | 2068 |      | 0.0254 | 0.0007 | 0.1783 | 0.0057 | 0.0508 | 0.0016 | 161.54 | 4.39 | 231.55 | 67.58  |
| HT3.7                                      | 688  | 200  |      | 0.0249 | 0.0007 | 0.1842 | 0.0070 | 0.0537 | 0.0021 | 158.56 | 4.22 | 366.72 | 54.63  |
| HT3.8                                      | 769  | 443  |      | 0.0254 | 0.0007 | 0.1903 | 0.0065 | 0.0545 | 0.0019 | 161.42 | 4.29 | 394.50 | 74.99  |
| HT3.9                                      | 784  | 425  |      | 0.0251 | 0.0007 | 0.1901 | 0.0069 | 0.0552 | 0.0020 | 160.09 | 4.46 | 420.42 | 76.85  |
| HT3.10                                     | 1190 | 1021 |      | 0.0264 | 0.0007 | 0.2065 | 0.0075 | 0.0570 | 0.0022 | 167.67 | 4.44 | 500.04 | 83.33  |
| HT3.11                                     | 449  | 244  |      | 0.0251 | 0.0007 | 0.1975 | 0.0073 | 0.0572 | 0.0022 | 159.58 | 4.24 | 498.19 | 87.95  |

Table S2. Major-element (wt%), REE, and trace-element (ppm) compositions of the Damaoshan pluton, Jiangxi Province

| Pluton Name                    | Damaoshan               |                         |                         |                         |                         |                         |                         |                         |                         |                         |                         |
|--------------------------------|-------------------------|-------------------------|-------------------------|-------------------------|-------------------------|-------------------------|-------------------------|-------------------------|-------------------------|-------------------------|-------------------------|
| No.                            | 1                       | 2                       | 3                       | 4                       | 5                       | 6                       | 7                       | 8                       | 9                       | 10                      | 11                      |
| Coordinate                     | E117.6638°<br>N28.6826° | E117.6633°<br>N28.6842° | E117.6511°<br>N28.6953° | E117.6635°<br>N28.6828° | E117.6636°<br>N28.6829° | E117.6637°<br>N28.6831° | E117.6639°<br>N28.6827° | E117.6634°<br>N28.6826° | E117.6634°<br>N28.6836° | E117.6633°<br>N28.6830° | E117.6633°<br>N28.6829° |
| SiO <sub>2</sub>               | 76.61                   | 74.6                    | 76.13                   | 72.89                   | 76.38                   | 74.76                   | 75.79                   | 76.86                   | 77.02                   | 77.86                   | 75.07                   |
| TiO <sub>2</sub>               | 0.088                   | 0.25                    | 0.16                    | 0.13                    | 0.14                    | 0.14                    | 0.12                    | 0.072                   | 0.079                   | 0.09                    | 0.12                    |
| Al <sub>2</sub> O <sub>3</sub> | 13.27                   | 12.62                   | 11.9                    | 13.87                   | 11.79                   | 12.64                   | 12.3                    | 12.18                   | 12                      | 11.16                   | 12.74                   |
| TF <sub>2</sub> O <sub>3</sub> | 0.14                    | 1.96                    | 1.45                    | 1.25                    | 1.43                    | 1.54                    | 1.28                    | 0.98                    | 0.93                    | 1.02                    | 1.34                    |
| MnO                            | 0.004                   | 0.029                   | 0.028                   | 0.021                   | 0.03                    | 0.03                    | 0.04                    | 0.026                   | 0.016                   | 0.021                   | 0.026                   |
| MgO                            | 0.056                   | 0.26                    | 0.15                    | 0.11                    | 0.12                    | 0.11                    | 0.12                    | 0.055                   | 0.053                   | 0.088                   | 0.12                    |
| CaO                            | 0.2                     | 0.64                    | 0.61                    | 0.67                    | 0.59                    | 0.7                     | 0.66                    | 0.27                    | 0.37                    | 0.59                    | 0.7                     |
| Na <sub>2</sub> O              | 5.56                    | 3.15                    | 3.16                    | 3.71                    | 3.38                    | 3.43                    | 3.62                    | 3.48                    | 3.23                    | 2.99                    | 3.56                    |
| K <sub>2</sub> O               | 3.16                    | 5.1                     | 5.04                    | 5.96                    | 4.78                    | 5.27                    | 4.66                    | 4.73                    | 5.36                    | 4.78                    | 4.96                    |
| P <sub>2</sub> O <sub>5</sub>  | 0.019                   | 0.046                   | 0.026                   | 0.021                   | 0.023                   | 0.023                   | 0.017                   | 0.007                   | 0.012                   | 0.012                   | 0.026                   |
| L.O.I                          | 0.55                    | 1.02                    | 0.94                    | 0.98                    | 0.86                    | 0.92                    | 1.04                    | 0.86                    | 0.71                    | 0.89                    | 0.97                    |
| Total                          | 99.66                   | 99.68                   | 99.59                   | 99.61                   | 99.52                   | 99.56                   | 99.65                   | 99.52                   | 99.78                   | 99.50                   | 99.63                   |
| Cr                             | 1.9                     | 2.2                     | 1.2                     | 1.2                     | 1.2                     | 1                       | 1.1                     | 1                       | 1                       | 0.88                    | 1.4                     |
| Ga                             | 20.2                    | 20.9                    | 20.4                    | 23.2                    | 20.8                    | 22.6                    | 23.5                    | 23.4                    | 22.9                    | 23.8                    | 21.6                    |
| Rb                             | 192                     | 246                     | 284                     | 362                     | 322                     | 379                     | 437                     | 559                     | 479                     | 422                     | 374                     |
| Ba                             | 61.1                    | 231                     | 127                     | 152                     | 95.6                    | 139                     | 59                      | 9.4                     | 45.7                    | 74.5                    | 144                     |
| Sr                             | 37.7                    | 60.5                    | 36.6                    | 34.9                    | 32.1                    | 30.8                    | 22.7                    | 5.2                     | 12.8                    | 16.8                    | 41.9                    |
| Y                              | 31                      | 34.5                    | 44.6                    | 41                      | 62.2                    | 69.9                    | 56.8                    | 64.4                    | 60.3                    | 70                      | 53.1                    |
| Zr                             | 137                     | 243                     | 196                     | 175                     | 193                     | 201                     | 192                     | 170                     | 158                     | 190                     | 164                     |
| Nb                             | 35.6                    | 25.3                    | 27.4                    | 29.8                    | 27.8                    | 31.7                    | 40.2                    | 62.4                    | 38.3                    | 46.8                    | 31.2                    |
| Hf                             | 5                       | 7.6                     | 6.5                     | 4.9                     | 5.8                     | 6                       | 5.5                     | 5.6                     | 4.9                     | 5.9                     | 5.8                     |
| Ta                             | 5.6                     | 2.3                     | 3                       | 3.1                     | 3.2                     | 3.6                     | 5.9                     | 9.9                     | 4.7                     | 5.8                     | 5.5                     |
| Th                             | 65.3                    | 28.2                    | 36.1                    | 51.9                    | 46.4                    | 62.8                    | 52.5                    | 70.7                    | 52.9                    | 59                      | 40.5                    |
| U                              | 5.3                     | 3.8                     | 8.6                     | 8.5                     | 8.7                     | 9.7                     | 11.2                    | 12.1                    | 14.6                    | 19.8                    | 13.1                    |

|                      |        |        |        |        |        |        |        |        |        |        |        |
|----------------------|--------|--------|--------|--------|--------|--------|--------|--------|--------|--------|--------|
| La                   | 31.1   | 86.4   | 77.9   | 66.1   | 81.6   | 81.1   | 75.1   | 30.2   | 53.4   | 94.5   | 50.6   |
| Ce                   | 50.8   | 155    | 145    | 125    | 154    | 158    | 148    | 55.6   | 101    | 180    | 98     |
| Pr                   | 7.2    | 18.4   | 16.9   | 14.5   | 18.4   | 18.8   | 17.8   | 8      | 11.4   | 20.8   | 11.9   |
| Nd                   | 25.3   | 61.9   | 56.5   | 47.9   | 60.8   | 62.2   | 58.7   | 28.3   | 37.5   | 66.6   | 41     |
| Sm                   | 4.8    | 10.2   | 10     | 8.7    | 11.4   | 11.6   | 11.3   | 6.8    | 7.4    | 12.8   | 8      |
| Eu                   | 0.24   | 0.63   | 0.39   | 0.41   | 0.34   | 0.34   | 0.23   | 0.043  | 0.17   | 0.19   | 0.41   |
| Gd                   | 4.5    | 9.3    | 9.2    | 8      | 10.4   | 10.7   | 10.3   | 6.5    | 7.2    | 12     | 7.4    |
| Tb                   | 0.9    | 1.4    | 1.5    | 1.3    | 1.8    | 1.8    | 1.8    | 1.4    | 1.4    | 2.2    | 1.4    |
| Dy                   | 6      | 7.3    | 8.5    | 7.7    | 11.2   | 11.5   | 10.8   | 10.1   | 9.5    | 14     | 8.6    |
| Ho                   | 1.3    | 1.4    | 1.7    | 1.6    | 2.4    | 2.4    | 2.2    | 2.3    | 2.1    | 2.9    | 1.8    |
| Er                   | 3.8    | 3.8    | 4.8    | 4.4    | 6.8    | 7      | 6.3    | 6.8    | 6.3    | 8.4    | 5.4    |
| Tm                   | 0.74   | 0.66   | 0.9    | 0.82   | 1.3    | 1.3    | 1.2    | 1.4    | 1.2    | 1.6    | 1.1    |
| Yb                   | 4.8    | 4.1    | 5.8    | 5.3    | 8.7    | 8.8    | 8      | 9.2    | 8      | 10.4   | 7.7    |
| Lu                   | 0.74   | 0.6    | 0.88   | 0.79   | 1.3    | 1.3    | 1.2    | 1.4    | 1.2    | 1.5    | 1.2    |
| Eu*                  | 0.16   | 0.20   | 0.12   | 0.15   | 0.10   | 0.09   | 0.07   | 0.02   | 0.07   | 0.05   | 0.16   |
| K                    | 26233  | 42338  | 41840  | 49477  | 39681  | 43749  | 38685  | 39266  | 44496  | 39681  | 41175  |
| Ti                   | 527    | 1498   | 959    | 779    | 839    | 839    | 719    | 432    | 474    | 539    | 719    |
| P                    | 83     | 201    | 113    | 92     | 100    | 100    | 74     | 31     | 52     | 52     | 113    |
| A/CNK                | 1.03   | 1.06   | 1.01   | 1.01   | 1.00   | 1.00   | 1.01   | 1.07   | 1.02   | 1.00   | 1.02   |
| Σ REE                | 142.22 | 361.09 | 339.97 | 292.52 | 370.44 | 376.84 | 352.93 | 168.04 | 247.77 | 427.89 | 244.51 |
| Σ LREE               | 119.44 | 332.53 | 306.69 | 262.61 | 326.54 | 332.04 | 311.13 | 128.94 | 210.87 | 374.89 | 209.91 |
| Σ HREE               | 22.78  | 28.56  | 33.28  | 29.91  | 43.90  | 44.80  | 41.80  | 39.10  | 36.90  | 53.00  | 34.60  |
| LREE/H<br>REE        | 5.24   | 11.64  | 9.22   | 8.78   | 7.44   | 7.41   | 7.44   | 3.30   | 5.71   | 7.07   | 6.07   |
| (La/Sm)<br>N         | 4.08   | 5.33   | 4.90   | 4.78   | 4.50   | 4.40   | 4.18   | 2.79   | 4.54   | 4.64   | 3.98   |
| (Gd/Yb)<br>N         | 0.76   | 1.83   | 1.28   | 1.22   | 0.96   | 0.98   | 1.04   | 0.57   | 0.73   | 0.93   | 0.78   |
| (La/Yb) <sub>N</sub> | 4.37   | 14.21  | 9.06   | 8.41   | 6.32   | 6.21   | 6.33   | 2.21   | 4.50   | 6.13   | 4.43   |
